# Supplementary material for: A Pro-Inflammatory Signature Constitutively Activated in Monogenic Autoinflammatory Diseases
Source: MDPI journal article supplement (doi:10.3390/ijms23031828), 2022-02-05
Supplement: s1 [file s1]

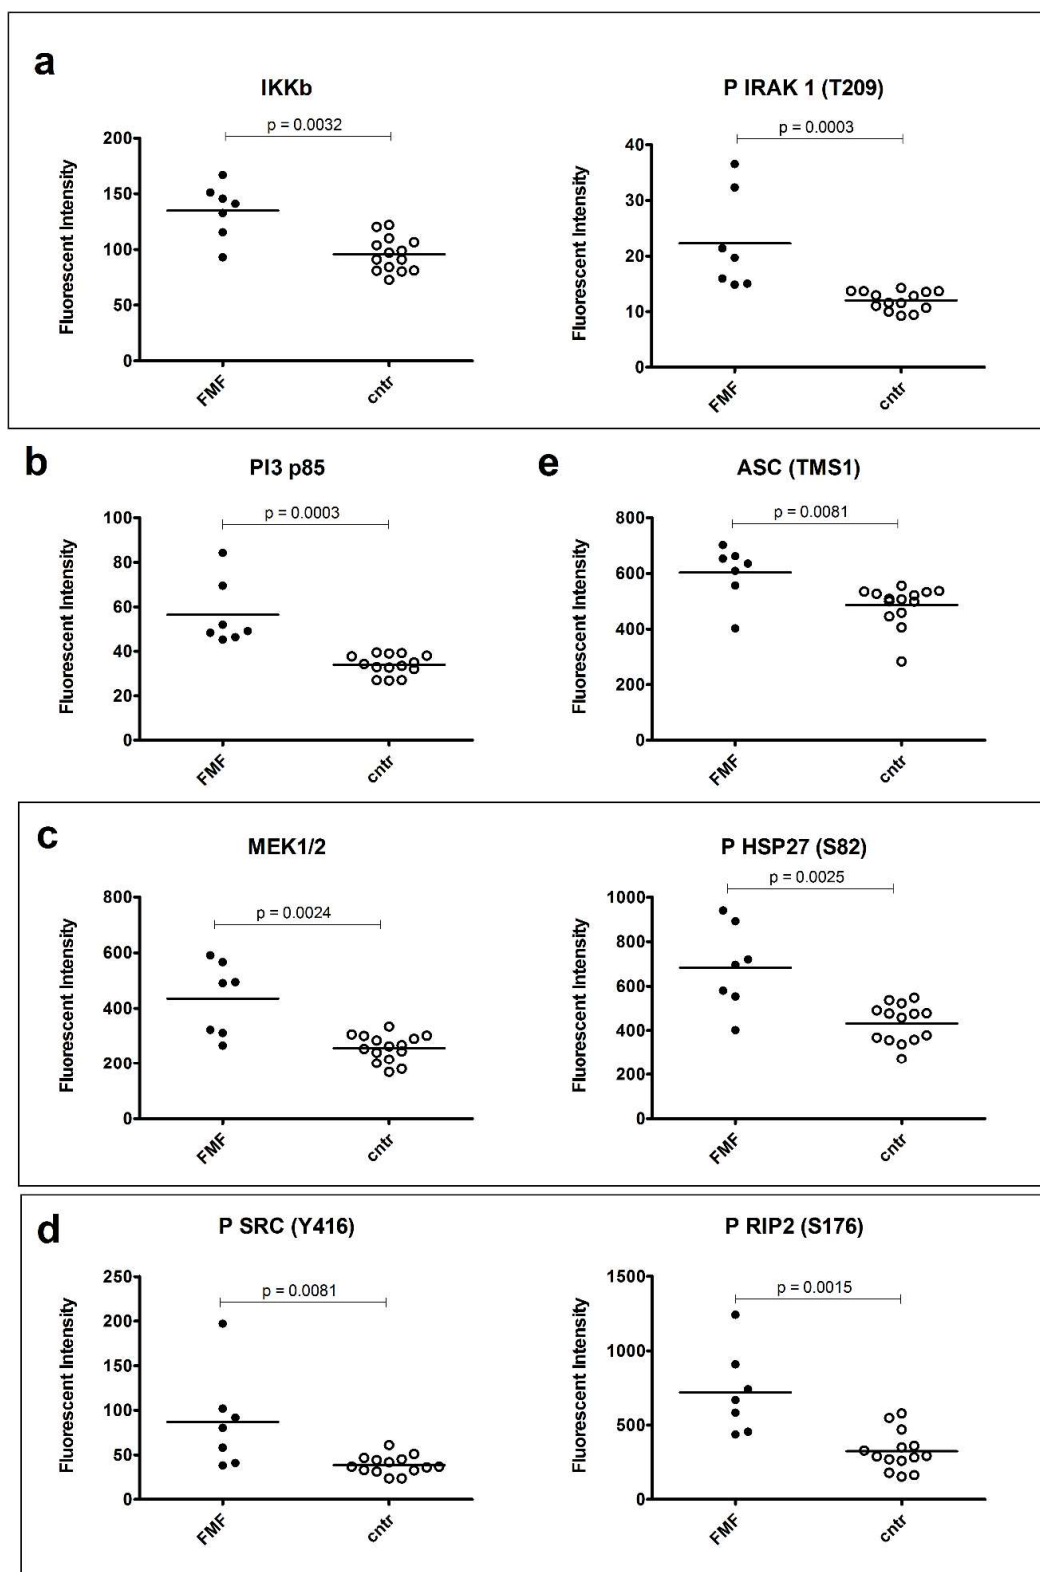

**Figure S1.** Scatter plots of the significantly upregulated expression levels of all intermediates in FMF patients from (a) NF- $\kappa$ B pathway, (b) PI3K–Akt pathway, (c) MAPK pathway, (d) JAK–STAT pathway, and (e) NLRP1 inflammasome pathway. All fluorescent signals are reported as arbitrary fluorescence units (AFU), with  $\beta$ -actin signal normalisation. Data are shown as means  $\pm$  SD of three independent experiments.

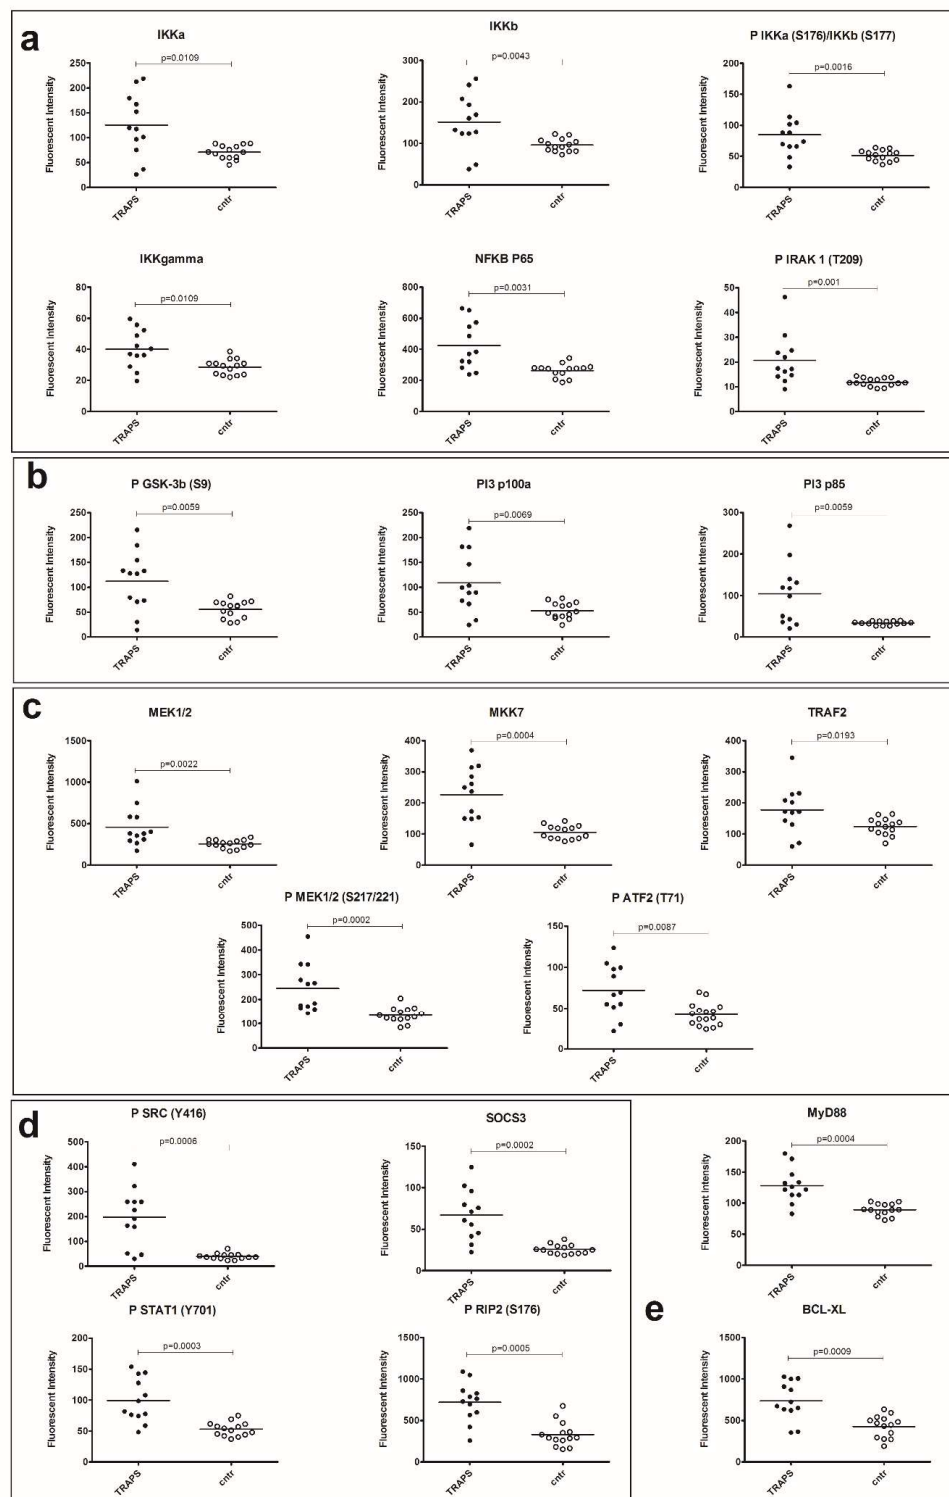

**Figure S2.** Scatter plots of the significantly upregulated expression levels of all intermediates in TRAPS patients from (a) NF- $\kappa$ B pathway, (b) PI3K–Akt pathway, (c) MAPK pathway, (d) JAK–STAT pathway, and (e) NLRP1 inflammasome pathway. All fluorescent signals are reported as arbitrary fluorescence units (AFU), with  $\beta$ -actin signal normalisation. Data are shown as means  $\pm$  SD of three independent experiments.

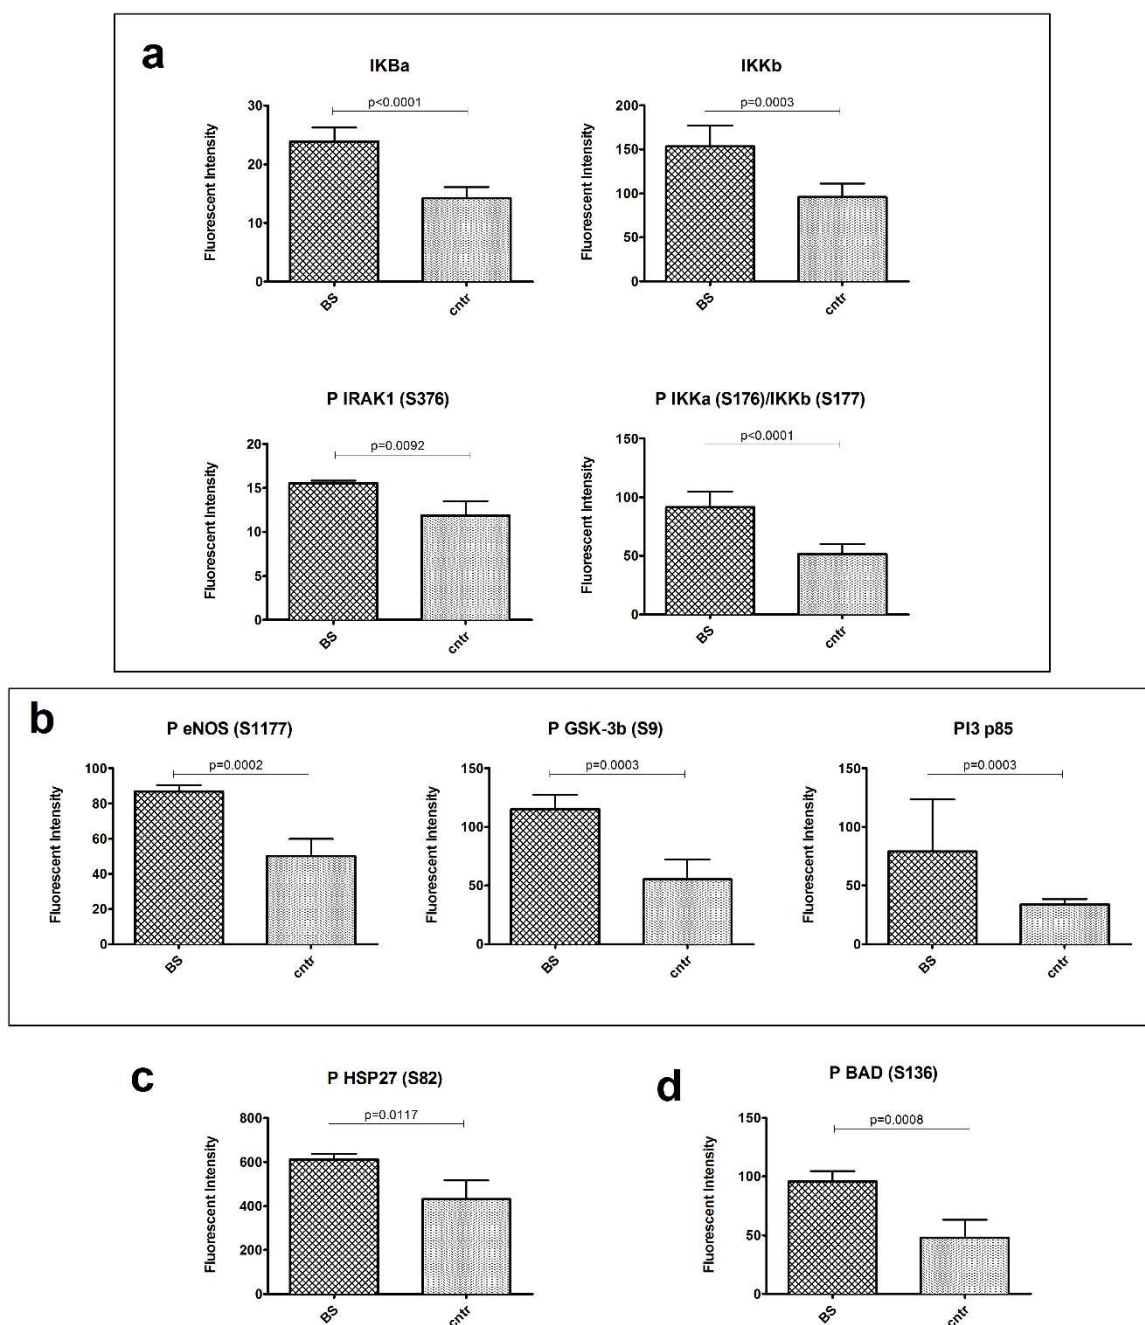

**Figure S3.** Scatter plots of the significantly upregulated expression levels of all intermediates in BS patients from (a) NF- $\kappa$ B pathway, (b) PI3K–Akt pathway, (c) MAPK pathway, and (d) NLRP1 inflammasome pathway. All fluorescent signals are reported as arbitrary fluorescence units (AFU), with  $\beta$ -actin signal normalisation. Data are shown as means  $\pm$  SD of three independent experiments.
